# Supplementary material for: Aged Human Multipotent Mesenchymal Stromal Cells Can Be Rejuvenated by Neuron-Derived Neurotrophic Factor and Improve Heart Function After Injury
Source: PubMed Central journal article supplement — JACC Basic Transl Sci. 2017 Nov 29;2(6):702–16. doi: 10.1016/j.jacbts.2017.07.014 (PMC6059002; doi:10.1016/j.jacbts.2017.07.014), 2017-11-29

1 SUPPLEMENTAL MATERIAL

2 for

3  
4 **Aged Human Multipotent Mesenchymal Stromal Cells Can Be Rejuvenated by Neuron-**  
5 **Derived Neurotrophic Factor and Improve Heart Function after Injury**  
6

7 Hui-Fang Song,MD, PhD <sup>\*†||</sup>, Sheng HeMD, PhD <sup>‡||</sup>, Shu-Hong LiMD, MSc <sup>||</sup>, Wen-Juan Yin,  
8 MD, MSc <sup>†</sup>,Jun Wu,MD, MSc <sup>||</sup>, Jian Guo,MD, PhD<sup>||</sup>,Zheng-Bo Shao,MD, PhD<sup>§||</sup>, Xiao-Yan  
9 Zhai,MD, PhD<sup>†</sup>, Hui Gong,MD, PhD<sup>†</sup>, Li Lu,MD, PhD <sup>\*</sup>, Fang Wei,MD, PhD<sup>§</sup>, Richard D.  
10 Weisel,MD<sup>||¶</sup>, Jun Xie,MD, PhD<sup>‡#</sup>, Ren-Ke Li,MD, PhD<sup>||¶#</sup>

11 <sup>\*</sup>Department of Anatomy, Shanxi Medical University, Taiyuan, China

12 <sup>†</sup>Shanxi Key Laboratory of Birth Defect and Cell Regeneration, Shanxi Medical University,  
13 Taiyuan, China

14 <sup>‡</sup>The First Hospital of Shanxi Medical University, Taiyuan, China

15 <sup>§</sup>Department of Ophthalmology, The Second Affiliated Hospital of Harbin Medical University,  
16 Harbin, China.

17 <sup>||</sup>Division of Cardiovascular Surgery, Toronto General Research Institute, University Health  
18 Network, Toronto, Ontario, Canada

19 <sup>¶</sup>Division of Cardiac Surgery, Department of Surgery, University of Toronto, Toronto, Ontario,  
20 Canada

21

22

23

24

1 **Supplemental Methods**

2

3 ***Culture of human bone marrow multipotent mesenchymal stromal cells (hBM-MSCs)***

4 A two-step procedure reported by Bartmann et al. (1) was adopted for culturing of hBM-  
5 MSCs. In brief, 1 ml of BM was harvested in a heparin sodium anticoagulation tube and gently  
6 mixed with 44 ml of 10% FBS-IMDM culture medium, composed of IMDM medium  
7 supplemented with 100 U/ml penicillin, 100 µg/ml streptomycin, and 10% fetal bovine serum  
8 (FBS). The mixture was then distributed into three T-75-flask. The medium was first changed  
9 48h later and then every week until obvious clones formed and then changed every three days  
10 until 80% confluence was attained. The cells were then detached with 0.25% trypsin plus 0.02%  
11 EDTA and sub-cultured at a density of 250 cells/cm<sup>2</sup>. Cells were used at 80% confluence at  
12 passage 3 for subsequent experiments. For the anti-apoptosis analysis, cells were cultured in  
13 hypoxia conditions (0.1% oxygen) for 48h and then TUNEL staining was performed or harvested  
14 for total protein for Western blot analysis.

15

16 ***hBM-MSC proliferation analyses***

17 To examine hBM-MSC proliferation, cells were incubated with a medium containing  
18 bromodeoxyuridine (BrdU, 10 µM) for 24h, and then fixed in PBS with 4% paraformaldehyde at  
19 room temperature for 20 min. After DNA denaturation in 2 N HCl, cells were permeabilized  
20 with Triton X-100 (0.1%) in PBS, and treated with serum to block nonspecific binding sites. The  
21 cells were incubated with rat anti-BrdU (ab6326, Abcam,1:100) overnight at 4°C, stained with  
22 Alexa Fluor 546 conjugated goat anti-rat antibody (A11081, Invitrogen,1:400) for 1h at 37°C ,  
23 and then mounted in mounting medium with 4',6-diamidino-2-phenylindole (DAPI).

1 To evaluate cell growth, hBM-MSCs from different groups were seeded in T-75-flasks at a  
2 density of 250 cells/cm<sup>2</sup> with complete culture medium and allowed to adhere to the flasks  
3 overnight. Cell numbers from triplicate flasks were counted daily for 8 days and cell growth  
4 recorded.

#### 6 *hBM-MSC migration analyses*

7 hBM-MSCs from different groups grown to confluence in 35 mm plates were scratched  
8 with a sterile pipette tip, washed twice with PBS and incubated in serum-free medium for 24h at  
9 37°C. Pictures were taken at 40X magnification using a phase-contrast microscope (Nikon) and  
10 the migration rate was calculated using ImageJ software (NIH).

11

#### 12 *Over-expression of NDNF in old hBM-MSCs and human dermal fibroblasts*

13 Cell transduction was carried out using a lentiviral expression vector carrying the NDNF  
14 gene (Lenti-Puro-EF1 $\alpha$ -NDNF-Homo-IRES-eGFP, Cyagen Biosciences Inc., Santa Clara, CA)  
15 according to the manufacturer's instructions. NDNF mRNA and protein levels were detected by  
16 reverse transcription-polymerase chain reaction (RT-PCR) and Western blot to ensure NDNF  
17 mRNA and protein over-expression in old hBM-MSCs and human dermal fibroblasts (Fibro).  
18 Human dermal fibroblasts were purchased from Invitrogen (C-013-5C) and cultured according to  
19 the manufacturer's instruction.

20

#### 21 *Immunofluorescence staining*

22 Cells grown on coverslips in 24-well plates at a density of 8000 cells/well were washed

1 with PBS and then fixed with 4% paraformaldehyde in PBS. The fixed cells were  
2 permeabilized with 0.2% Triton X-100 in PBS and blocked for 1 h in PBS containing 10%  
3 bovine serum albumin. They were then incubated with primary antibodies overnight at 4°C,  
4 followed by incubation with secondary antibodies and then mounted in mounting medium with  
5 DAPI. Antibodies used included: NDNF (ab175602, Abcam, 1:100); mitochondria (MAB1273,  
6 Millipore, 1:100);  $\alpha$ -SMA (A2547, Sigma, 1:400). Isolectin B4 (121412, Thermo Fisher  
7 Scientific, 1:50) staining was carried out for 30min at RT to assess capillary density.

8

### 9 ***Western blotting***

10 Cells or tissues were harvested on ice using RIPA buffer with protease inhibitor and  
11 phosphatase inhibitors. Cells were harvested at 80% confluence. Equal amounts of protein was  
12 loaded onto SDS-polyacrylamide gel and transferred to PVDF membranes. After blocking,  
13 membranes were incubated with primary antibodies overnight at 4°C, followed by incubation  
14 with secondary antibodies. An ECL Western blotting detection reagent was used to detect signals.  
15 Antibodies used include:  $\beta$ -actin (TA-09, ZSGB-BIO, 1:2000); NDNF (ab175602,  
16 Abcam, 1:1000); regucalcin (ab67336, Abcam, 1:500); p16 (sc-1661, Santa Cruz  
17 Biotechnology, 1:100); Bax (sc-20067, Santa Cruz Biotechnology, 1:200); GAPDH (MAB374,  
18 Millipore, 1:5000); p-Akt (4060, Cell Signaling, 1:2000); Akt (4691, Cell Signaling, 1:1000); p-  
19 ATM (5883, Cell Signaling, 1:1000); ATM (sc-377293, Santa Cruz Biotechnology, 1:100); p-  
20 chk1 (2348, Cell Signaling, 1:1000); chk1 (sc-8408, Santa Cruz Biotechnology, 1:100); p-p53 (sc-  
21 377567, Santa Cruz Biotechnology, 1:100); p53 (sc-126, Santa Cruz Biotechnology, 1:100);  
22 p27 (3686s, Cell Signaling, 1:1000); p21 (2947s, Cell Signaling, 1:1000). The grey level of bands  
23 was obtained by ImageJ software (NIH), and protein expression level was calculated using the

1 ratio to the loading control ( $\beta$ -actin or GAPDH).

2

### 3 ***Total RNA extraction and RT-PCR***

4 Total RNA was extracted from cells with trizol reagent and converted to cDNA. PCR  
5 reaction mixture contained *Taq 2X* master mix, 1ul primer (forward and reverse mixture) and  
6 50ng cDNA. Reaction products were analyzed by 1% agarose gel electrophoresis. ACTB ( $\beta$ -  
7 actin) served as the endogenous control for normalization. For quantification, densitometry of the  
8 NDNF bands was divided by the corresponding densitometry of the  $\beta$ -actin band using ImageJ  
9 software. To compare from assay to assay (gel to gel), the average of the infant group (Fig. 1) or  
10 the average of the Old MSCs group (Fig. 3) on the same gel was set at a value of 1 as a control  
11 and all the other groups were compared with the corresponding control on the same gel. The  
12 primers used were as follows: NDNF–forward primer: 5'-CCTTTGGAGTGGAAGCTGAG-3';  
13 reverse primer: 5'-GTAGACATGACGCCCCAGTT-3'; ACTB–forward primer: 5'-  
14 AGAAAATCTGGCACCACACC-3'; reverse primer: 5'-AGGAAGGAAGGCTGGAAGAG-  
15 3'.Collagen, type I, alpha 1 (COL1A1)–forward primer: 5'-CCCTGGAAAGAATGGAGATG-3';  
16 reverse primer: 5'-CCATCCAAACCACTGAAACC-3';Lipoprotein lipase (LPL)–forward  
17 primer: 5'-GGGCATGTTGACATTTACCC-3';reverse primer: 5'-  
18 AGCCCTTTCTCAAAGGCTTC-3'.

19

### 20 ***SA- $\beta$ -gal staining***

21 Cells grown in 6-well plates were washed with PBS and then stained with the senescence  $\beta$ -  
22 galactosidase staining kit (C0609, Beyotime Biotechnology, Shanghai, China) according to the  
23 manufacturer's instruction. Briefly, the cells were fixed with the fixing solution for 15 min, then

1 washed with PBS and incubated with the SA- $\beta$ -gal staining solution(SA- $\beta$ -gal staining solution  
2 A 10 $\mu$ l, SA- $\beta$ -gal staining solution B 10 $\mu$ l, SA- $\beta$ -gal staining solution C 930 $\mu$ l and X-gal 50 $\mu$ l)  
3 overnight at 37 °C. Pictures were taken using a Nikon microscope.

#### 5 ***Colony formation assay***

6 hBM-MSCs from different groups were seeded in 10 cm dish(200 cells/dish) and let to grow  
7 for 3 weeks. Then the cells were washed twice with PBS, allowed to air dry for 5 min and  
8 subsequently fixed with methanol for 3 min at room temperature. Giemsa staining was carried  
9 out with a Giemsa staining solution (G1015, SolarbioScience&Technology Ltd., Beijing, China)  
10 at room temperature for 30min.The images were captured and colonies were counted.

#### 12 ***Adipogenic and Osteogenic Differentiation***

13 hBM-MSCs from different groups were plated into 12-well plates and grown to  
14 confluence. The medium was changed to adipogenic or osteogenic differentiation medium and  
15 cultured according to the manufacturer's instructions(HUXMA-90021 or HUXMA-90021,  
16 Cyagen Biosciences Inc., Jiangsu, China). The differentiation characteristics were examined with  
17 Oil Red O staining or Alizarin red staining according to the manufacturer's instructions.

#### 19 ***Knockdown of NDNF in young hBM-MSCs***

20 Transfection of NDNF siRNA or a scrambled control siRNA was carried out (GenePharma  
21 Co.,Ltd., Shanghai, China) according to the manufacturer's instructions. NDNF mRNA and  
22 protein levels were evaluated by reverse transcription-polymerase chain reaction(RT-PCR) and

1 Western blot to ensure the NDNF mRNA and protein was successfully knocked down in young  
2 hBM-MSCs.

3

#### 4 ***ELISA and in vitro tube formation assay***

5 NDNF-transduced hBM-MSCs (Old+NDNF) or empty vector-transduced hBM-MSCs (Old)  
6 were normally cultured to 70-80% confluence, after which the culture medium was replaced with  
7 2% FBS-IMDM and cultured for 4 more days. The conditioned medium was then harvested for  
8 the following Enzyme-Linked Immunosorbent Assay (ELISA) analysis and tube formation assay.  
9 The harvested conditioned medium was concentrated using an Amicon ultra-4 centrifugal filter  
10 unit (Millipore) and the NDNF level was detected in the conditioned medium with the NDNF  
11 ELISA kit (SEU433Hu, USCN Business Co., Wuhan, China) following the manufacturer's  
12 instructions.

13 For the endothelial tube formation assay, human umbilical vein endothelial cells (HUVECs)  
14 were used. Briefly, 100ul/well matrigel was coated in the 96-well plate and HUVECs were  
15 suspended with the conditioned medium.  $2.5 \times 10^4$  cells/well were dispensed and incubated for 3 h.  
16 Pictures were taken using a Nikon microscope and the numbers of tubes counted to measure tube-  
17 forming ability.

18 1. Bartmann C, Rohde E, Schallmoser K, Pürstner P, Lanzer G, Linkesch W, Strunk D. Two  
19 steps to functional mesenchymal stromal cells for clinical application.  
20 Transfusion. 2007;47(8):1426-35.

21

22

23

24

## Supplemental Figure Legends

### **Supplemental Figure 1: NDNF transduction rejuvenated old hBM-MSCs by suppressing the senescence-associated phenotype.**

(A) Western blot showed that the expression of phospho-ATM and total ATM, the senescence-associated DNA damage protein, was significantly higher in empty vector-transduced (Old) compared to NDNF-transduced (NDNF+Old) hBM-MSCs. (B) Western blot showed that the expression of phospho-chk1, phospho-p53 and total p53, the senescence-associated DNA damage proteins, was significantly higher in empty vector-transduced (Old) compared to NDNF-transduced (NDNF+Old) hBM-MSCs. (C) Western blot showed that the expression of p-27 and p-21, the senescence-associated CDK inhibitors, was significantly higher in empty vector-transduced (Old) compared to NDNF-transduced (NDNF+Old) hBM-MSCs. n=5/group. ATM: Ataxia telangiectasia mutated kinase; p-ATM: Phospho-ATM (Ser1981), p-chk1: phospho-chk1(Ser345); p-53: phospho-p53 (Thr155); p27: p27(Kip1); p21: p21(Waf1); CDK inhibitors: cyclin-dependent kinase inhibitors.

### **Supplemental Figure 2: NDNF transduction enhanced the self-renewal ability and the differentiation potential to form adipocytic and osteocytic lineage of old hBM-MSCs.**

(A) Digital image showing colonies produced by old hBM-MSCs. The number of colonies was significantly lower in empty vector-transduced (Old) compared to NDNF-transduced (NDNF+Old) hBM-MSCs. n=5/group. (B) Representative Oil Red O staining and quantification of Oil Red O stained area indicated that there were more MSCs undergoing adipogenic differentiation in NDNF+Old than in Old group. (C) Higher mRNA level of



1 adipogenic-related gene LPL in NDNF-transduced (NDNF+Old) compared to empty vector-  
2 transduced (Old) hBM-MSCs.n=5/group. **(D)** Osteoblast differentiation of hBM-MSCs was  
3 determined by Alizarin Red S staining. There were more Alizarin Red S stained area in  
4 NDNF+Old than in Old group. **(E)** Higher mRNA level of osteogenic-related gene COL1A1 in  
5 NDNF-transduced (NDNF+Old) compared to empty vector-transduced (Old) hBM-MSCs.  
6 n=5/group. LPL:Lipoprotein lipase; COL1A1: Collagen, type I, alpha 1.

7

8 **Supplemental Figure 3: Knock-down NDNF in young hBM-MSCs increased cell senescence**  
9 **and decreased cell proliferative capacity**

10 **(A)** Representative micrographs of senescence-associated  $\beta$  galactosidase staining and  
11 quantification of  $\beta$ -gal<sup>+</sup> cells in the scrambled siRNA (Young) and NDNF siRNA  
12 (Young+siNDNF) transfected hBM-MSCs. **(B)** Cell growth curves showed that the growth rate  
13 was significantly higher in the scrambled siRNA (Young) compared to NDNF siRNA  
14 (Young+siNDNF) transfected hBM-MSCs. **(C)** Western blot showed that the expression of  
15 phospho-ATM and total ATM, the senescence-associated DNA damage protein, was significantly  
16 lower in the scrambled siRNA (Young) compared to NDNF siRNA (Young+siNDNF) transfected  
17 hBM-MSCs. **(D)** Western blot showed that the expression of phospho-chk1, phospho-p53 and  
18 total p53, the senescence-associated DNA damage proteins, was significantly lower in the  
19 scrambled siRNA (Young) compared to NDNF siRNA (Young+siNDNF) transfected hBM-  
20 MSCs. **(E)** Western blot showed that the expression of p-27 and p-21, the senescence-associated  
21 CDK inhibitors, was significantly lower in the scrambled siRNA (Young) compared to NDNF  
22 siRNA (Young+siNDNF) transfected hBM-MSCs. n=5/group. ATM: Ataxia telangiectasia  
23 mutated kinase; p-ATM: Phospho-ATM (Ser1981), p-chk1: phospho-chk1(Ser345); p-53:

1 phospho-p53 (Thr155); p27: p27(Kip1); p21: p21(Waf1); CDK inhibitors: cyclin-dependent  
2 kinase inhibitors.

3 **Supplemental Figure 4: Knock-down of NDNF decreased the self-renewal ability but did**  
4 **not alter the differentiation potential to form adipocytic and osteocytic lineage of young**  
5 **hBM-MSCs.**

6 (A) Digital image showing colonies produced by young hBM-MSCs. The number of colonies  
7 was significantly higher in young compared to young+siNDNF transfected hBM-MSCs.  
8 n=5/group. (B) Representative Oil Red O staining and quantification of Oil Red O stained area  
9 indicated that adipogenic differentiation in young was the same as the young+siNDNF  
10 transfected hBM-MSCs. (C) The mRNA level of adipogenic-related gene LPL in young  
11 compared to young+siNDNF group. n=5/group. (D) Osteoblast differentiation of hBM-MSCs  
12 was determined by Alizarin Red S staining. The Alizarin Red S stained area in young was the  
13 same as in young+siNDNF group. (E) The mRNA level of osteogenic-related gene COL1A1 in  
14 young compared to siNDNF-transfected (young) hBM-MSCs. n=5/group. LPL: Lipoprotein  
15 lipase; COL1A1: Collagen, type I, alpha 1.

16

17

# Supplemental Figure 1

## A

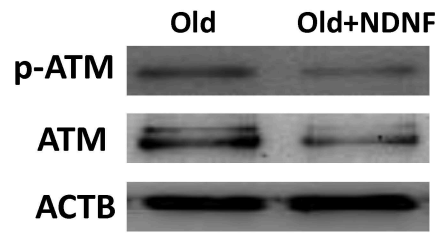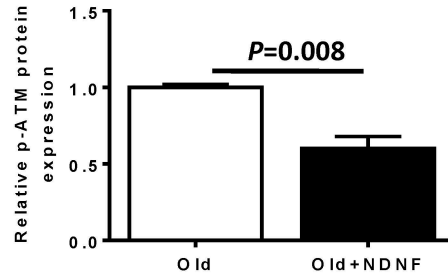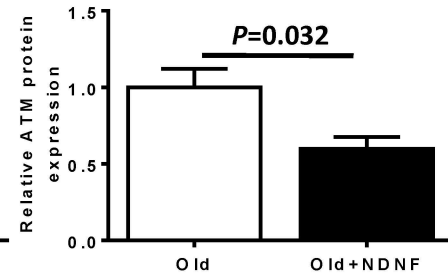

## B

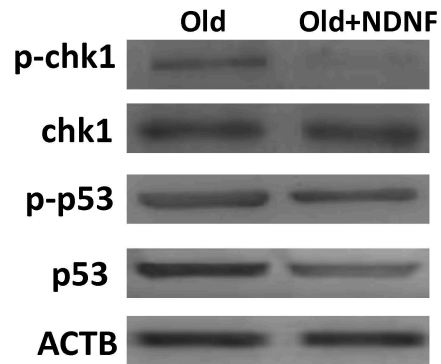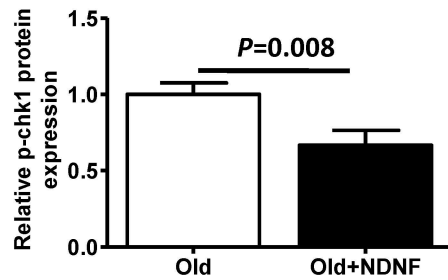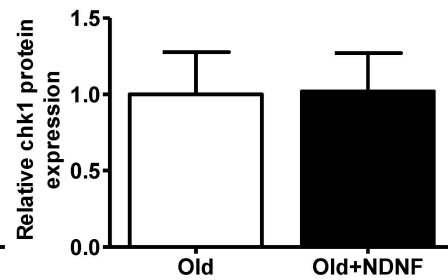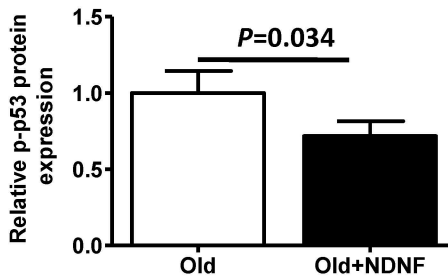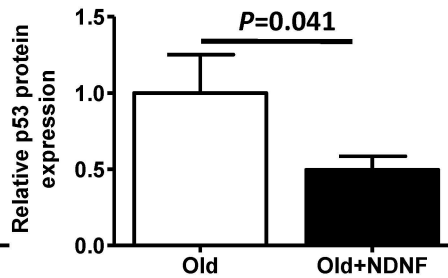

## C

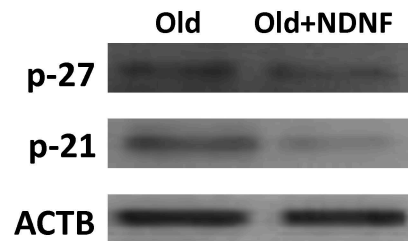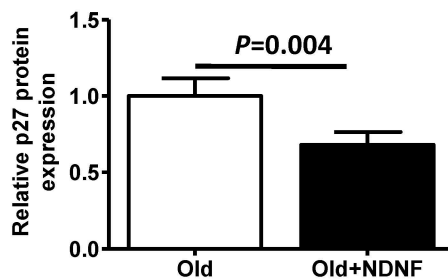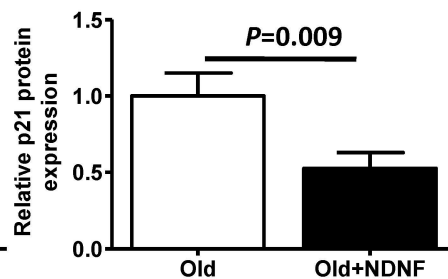

# Supplemental Figure 2

**A**

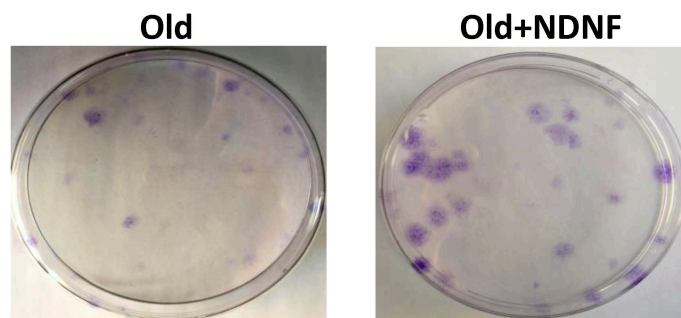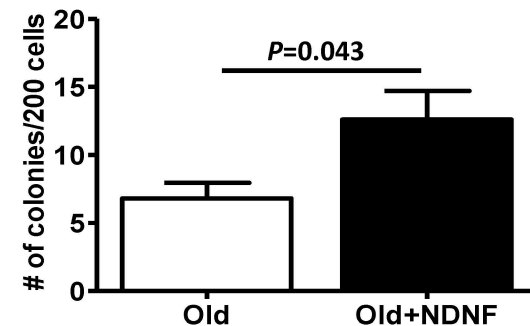

**B**

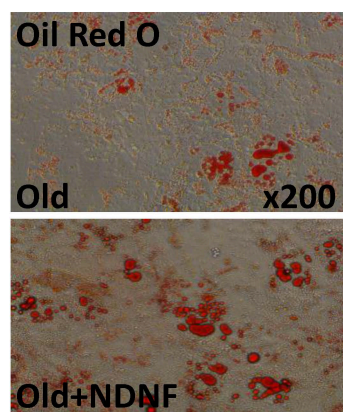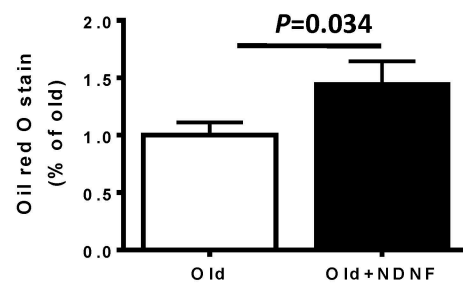

**C**

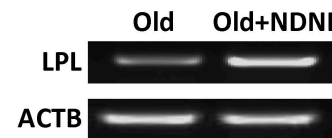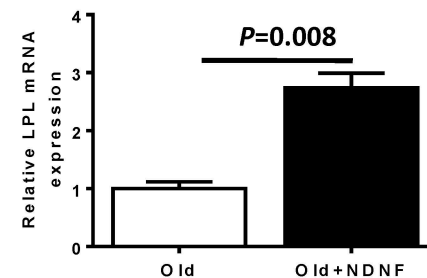

**D**

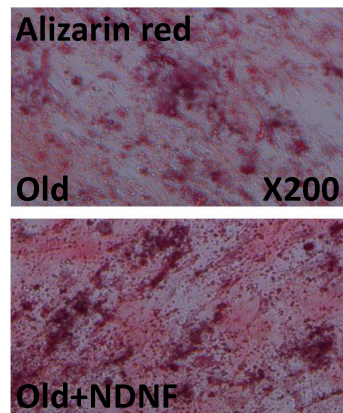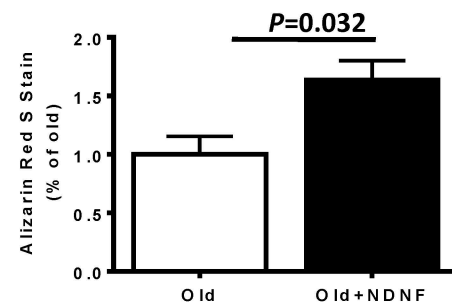

**E**

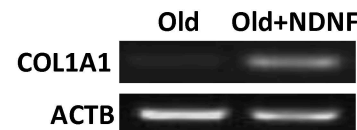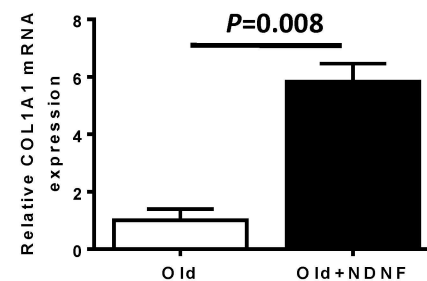

Supplemental Figure 3

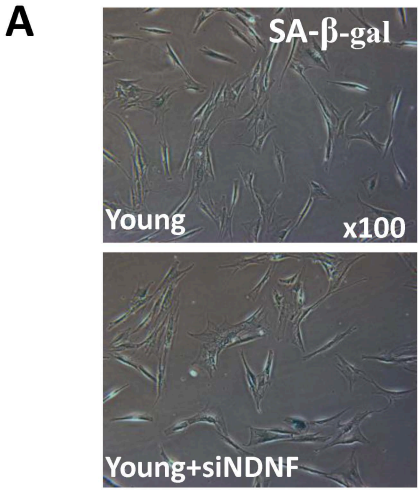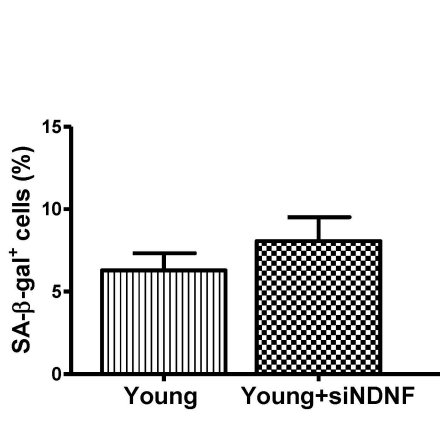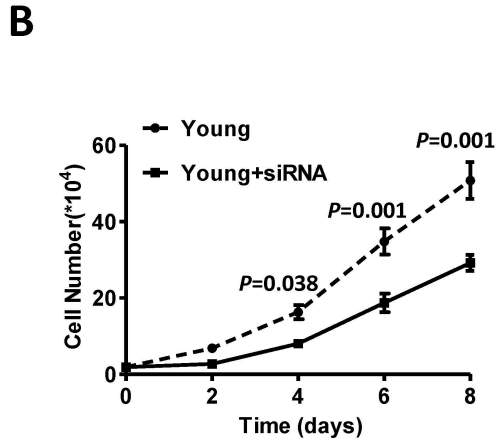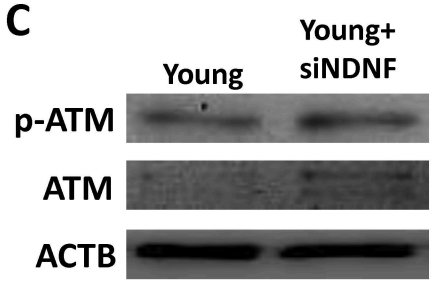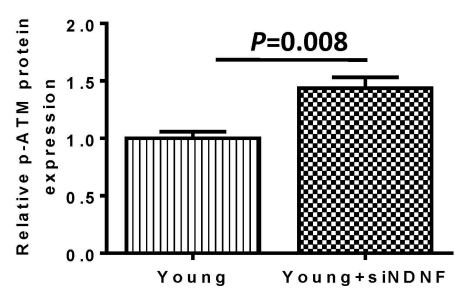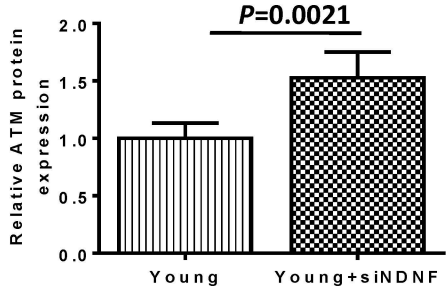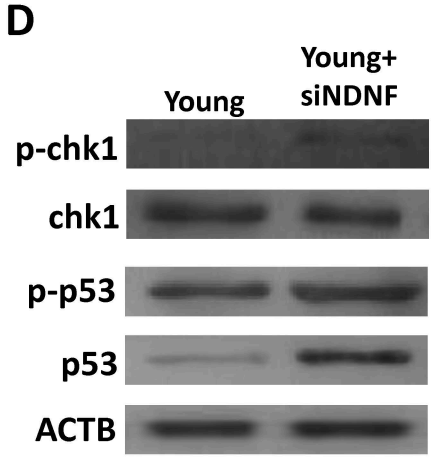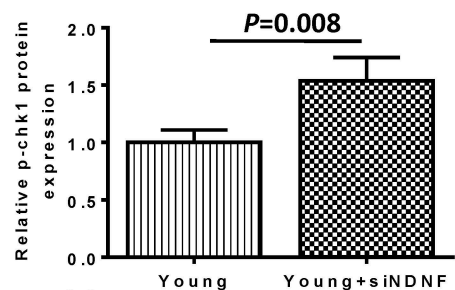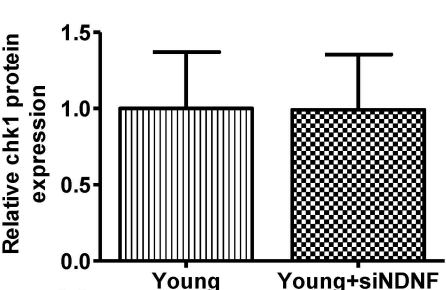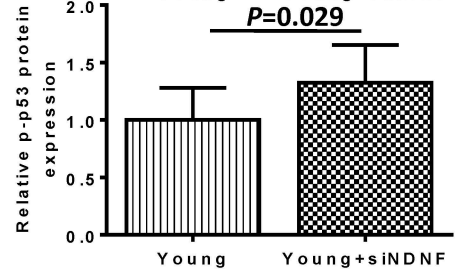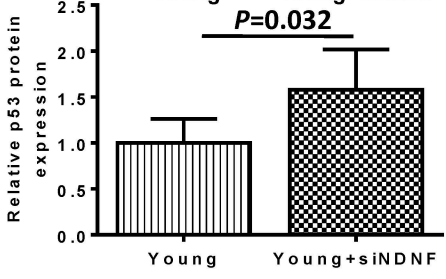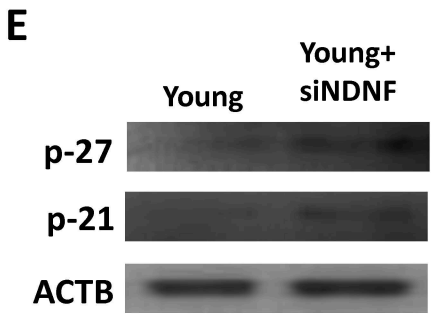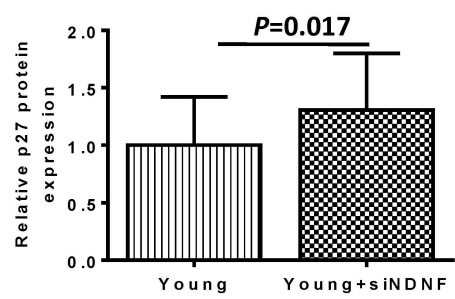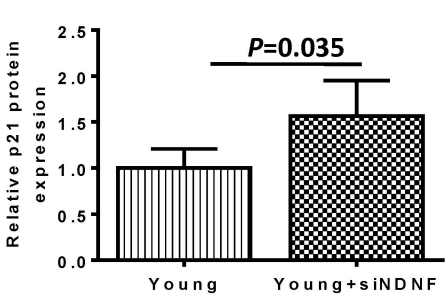

# Supplemental Figure 4

**A**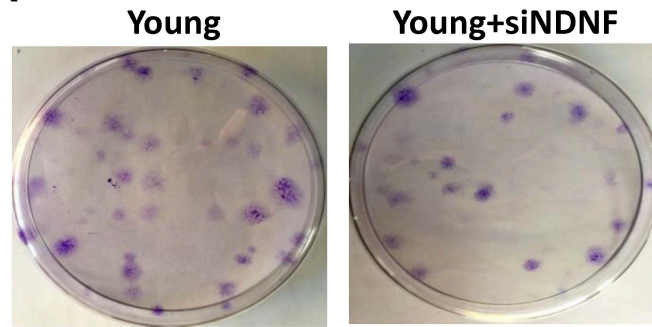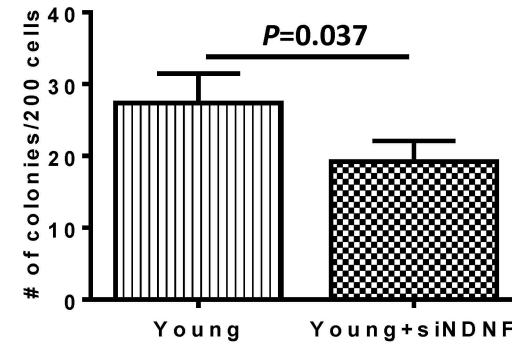**B**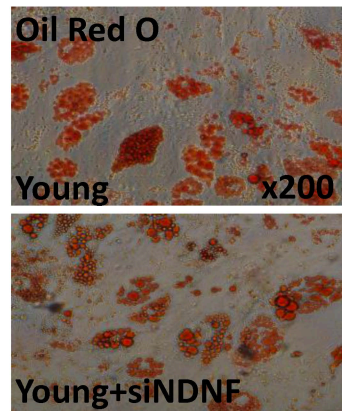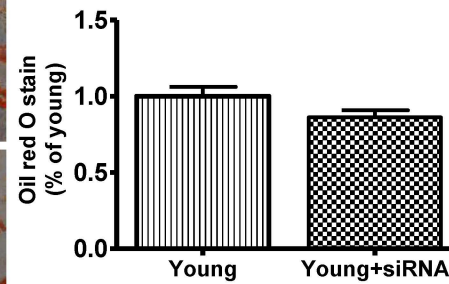**C**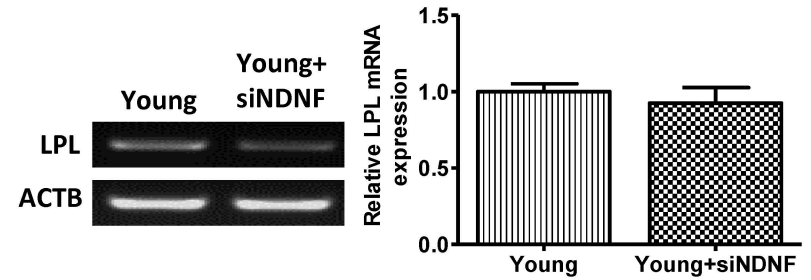**D**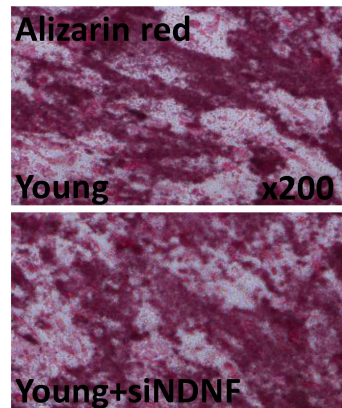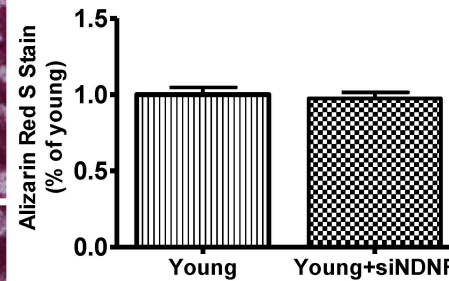**E**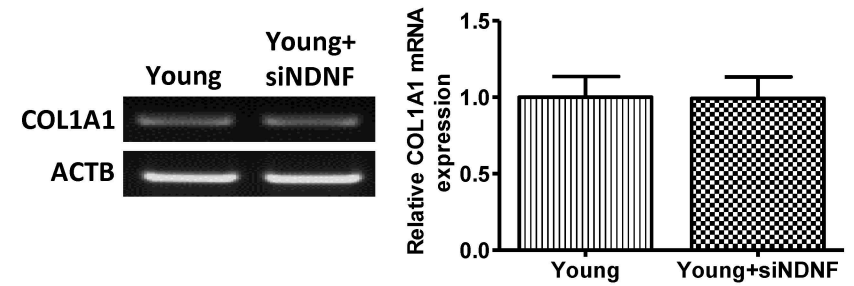

Supplement: mmc1.pdf [file mmc1.pdf]
